# Supplementary material for: Oxidative polymerization of catecholamines: structural access by high-resolution mass spectrometry
Source: Royal Society of Chemistry journal article supplement (doi:10.1039/c7py00506g), 2017-01-01
Supplement: c7py00506g1.pdf [file c7py00506g1.pdf]

## Supporting Information

### **Oxidative Polymerization of Catecholamines: Structural Access by High-Resolution Mass Spectrometry**

*Hendrik Woehlke,<sup>a,b</sup> Jan Steinkoenig,<sup>b,c</sup> Christiane Lang,<sup>a</sup> Anja S. Goldmann,<sup>a,b,c</sup> Leonie Barner,<sup>a,c</sup> James P. Blinco,<sup>a,b</sup> Kathryn E. Fairfull-Smith<sup>\*a</sup> and Christopher Barner-Kowollik<sup>\*a,b,c</sup>*

<sup>a</sup> School of Chemistry, Physics and Mechanical Engineering, Faculty of Science and Engineering, Queensland University of Technology (QUT), 2 George St, Brisbane, QLD 4000, Australia

<sup>b</sup> Preparative Macromolecular Chemistry, Institut für Technische Chemie und Polymerchemie, Karlsruhe Institute of Technology (KIT), Engesserstr. 18, 76131 Karlsruhe, Germany

<sup>c</sup> Institut für Biologische Grenzflächen, Karlsruhe Institute of Technology (KIT), Hermann-von-Helmholtz-Platz 1, 76344 Eggenstein-Leopoldshafen, Germany

<sup>\*</sup>to whom correspondence should be addressed

E-mail: *k.fairfull-smith@qut.edu.au; christopher.barnerkowollik@qut.edu.au;*  
*christopher.barner-kowollik@kit.edu*

## **Materials**

Acetonitrile (Carl Roth, LC-MS grade  $\geq 99.95\%$ , employed for ESI MS), 4-amino-2,2,6,6-tetramethylpiperidine-1-oxyl (4-amino-TEMPO; abcr, 97%), chloroform- $d_1$  ( $CDCl_3$ ; Sigma-Aldrich, 99.8% D), cyclohexane (VWR, p.a.), dry dichloromethane (dry DCM; Acros, 99.8% extra dry), diethyl ether (VWR, p.a.), 4-(dimethylamino)pyridine (DMAP; Acros, 99%), dimethyl sulfoxide (DMSO; Roth, 99%), ethyl acetate (VWR, p.a.), 1-ethyl-3-(3-dimethylaminopropyl) carbodiimide hydrochloride (EDC·HCl; Carl Roth,  $>99\%$ ), hydrogen chloride solution, 2 M in diethyl ether (Alfa Aesar), hydrogen peroxide solution 30% (w/w in water) (Carl Roth), iron(II) sulfate heptahydrate (VWR, 99%), methanol (MeOH; Carl Roth, HPLC grade, employed for ESI MS), methanol- $d_4$  (MeOD; Sigma-Aldrich, 99.8% D), silica gel (Merck), sodium bicarbonate (Carl Roth,  $\geq 99\%$ ), sodium chloride (Carl Roth,  $\geq 99\%$ ), sodium sulfate (Carl Roth,  $\geq 99\%$ ), tetrahydrofuran (THF; GPC grade, Scharlau, employed for ESI MS) and tris-(hydroxymethyl)methylamine (Tris; Acros,  $>99\%$ ) were used as received. Type I ultrapure water was obtained from Puranity PU 15 water purification system (VWR, employed for polymerization and ESI MS). Thin layer chromatography (TLC) was performed on aluminium plates coated with silica gel 60 F<sub>254</sub> (Merck).

## **Characterization Methods**

**$^1H$  NMR (400 MHz) and  $^{13}C$  NMR (101 MHz) spectroscopy** was performed on a Bruker Ascend 400 spectrometer. All samples were recorded in  $CDCl_3$  or MeOD. Chemical shifts are expressed in parts per million (ppm) and coupling constants ( $J$  values) are reported in Hz. The  $\delta$ -scale is referenced to characteristic solvent signals as internal standards.

**Electrospray ionization mass spectrometry (ESI MS)** was performed using a LTQ Orbitrap XL Q Exactive mass spectrometer (Thermo Fisher Scientific, San Jose, CA, USA) equipped with an HESI II probe. The instrument was calibrated in the range of  $m/z$  74 – 1822 using standard calibration solutions (Thermo Scientific). The FT resolution was set to 140 000, the capillary temperature was set to 320 °C and the S-lens RF level to 68.0. The dimensionless gas flow rates were set to 10 (sheath gas), 0 (sweep gas), 0 (aux gas) employing negative ion mode and 5 (sheath gas), 0 (sweep gas), 1 (aux gas) employing positive ion mode. A collision induced dissociation (CID) energy of 80 eV was employed. The spectra were recorded with a constant spray voltage of  $3.4 \pm 0.2$  kV for ESI-CID MS and 4.3 kV for ESI-CID MS/MS, respectively. The samples were dissolved in water/acetonitrile (1:1, v/v) doped with 0.1% (v/v) acetic acid or in THF/MeOH (3:2, v/v) with a concentration of 0.05 mg·mL<sup>-1</sup>. All samples were filtered prior to injection. The recorded MS spectra were evaluated using the Xcalibur software.

## Experimental Data

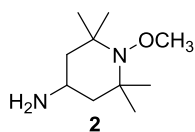

**1-Methoxy-2,2,6,6-tetramethylpiperidin-4-amine (2):** Compound **2** was prepared by modification of a literature procedure.<sup>1</sup> 4-Amino-2,2,6,6-tetramethylpiperidine (1.71 g, 10.0 mmol, 1.0 eq.) was dissolved in DMSO (20 mL). After the addition of Fe(II)SO<sub>4</sub>·7H<sub>2</sub>O (6.95 g, 25.0 mmol, 2.5 eq.), the solution was placed in an ice bath and H<sub>2</sub>O<sub>2</sub> solution (4.30 mL, 30% w/w, 5.0 eq.) was added dropwise to the vigorously stirring solution. The reaction mixture was stirred overnight and allowed to reach room temperature. The solution was basified using 2M NaOH (50 mL), the precipitate was filtered off and the filtrate was extracted with diethyl ether (3 × 50 mL). The organic phase was washed with deionised water (15 mL) and dried over Na<sub>2</sub>SO<sub>4</sub>. The solvent was carefully removed under reduced pressure yielding a yellow liquid (1.38 g, 7.4 mmol, 74%).

<sup>1</sup>H NMR (400 MHz, CDCl<sub>3</sub>, 298 K)  $\delta$  = 3.59 (s, 3H, O-CH<sub>3</sub>), 3.04 – 2.93 (m, 1H, H<sub>2</sub>N-CH), 1.69 – 1.59 (m, 2H, CH(CH<sub>2</sub>)<sub>2</sub>), 1.33 – 1.21 (m, 2H, CH(CH<sub>2</sub>)<sub>2</sub>), 1.18 (s, 6H, C(CH<sub>3</sub>)<sub>2</sub>), 1.11 (s, 6H, C(CH<sub>3</sub>)<sub>2</sub>) ppm. <sup>13</sup>C NMR (101 MHz, CDCl<sub>3</sub>, 298 K)  $\delta$  = 65.5 (O-CH<sub>3</sub>), 60.0 (C(CH<sub>3</sub>)<sub>2</sub>), 50.0 (CH(CH<sub>2</sub>)<sub>2</sub>), 42.2 (H<sub>2</sub>N-CH), 33.2 (C(CH<sub>3</sub>)<sub>2</sub>), 20.9 (C(CH<sub>3</sub>)<sub>2</sub>) ppm. HRMS (*m/z*) calculated for C<sub>10</sub>H<sub>23</sub>N<sub>2</sub>O [M+H]<sup>+</sup> 187.1805, found 187.1808.

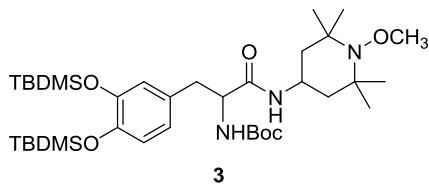

**(TBDMS)<sub>2</sub>-N-Boc-DOPA-TEMPO-CH<sub>3</sub> (3):** 1-Methoxy-2,2,6,6-tetramethylpiperidin-4-amine (**2**) (1.12 g, 6.0 mmol, 1.0 eq.) and DMAP (1.47 g, 12.0 mmol, 2.0 eq.) were dissolved in dry DCM (25 mL). 3,4-bis(*tert*-Butyldimethylsilyloxy)-*N*-*tert*-butyloxycarbonyl-L-phenylalanine (**1**) (3.15 g, 6.0 mmol, 1 eq.), previously prepared according to a literature procedure,<sup>2</sup> was added to the solution followed by the addition of EDC·HCl (2.30 g, 12.0 mmol, 2.0 eq.). The reaction mixture was stirred at ambient temperature for 24 h followed by extraction with saturated NaHCO<sub>3</sub> solution (25 mL), water (10 mL) and brine (10 mL). The organic phase was dried over Na<sub>2</sub>SO<sub>4</sub> and evaporated under reduced pressure. The crude product was purified by column chromatography employing ethyl acetate and cyclohexane (2:7) as solvent mixture (*R*<sub>f</sub> = 0.44) yielding a yellow solid (3.47 g, 5.0 mmol, 83%).

<sup>1</sup>H NMR (400 MHz, MeOD, 298 K)  $\delta$  = 6.77 (d, *J* = 8.0 Hz, 1H, O-C<sub>Ar</sub>-C<sub>Ar</sub>H-C<sub>Ar</sub>H), 6.73 (d, *J* = 2.1 Hz, 1H, O-C<sub>Ar</sub>-C<sub>Ar</sub>H-C<sub>Ar</sub>H), 6.70 (dd, *J* = 8.1, 2.1 Hz, 1H, O-C<sub>Ar</sub>-C<sub>Ar</sub>H-C<sub>Ar</sub>H), 4.18 – 4.08 (m, 1H, C<sub>Ar</sub>-CH<sub>2</sub>-CH), 4.06 – 3.94 (m, 1H, NH-CH(CH<sub>2</sub>)<sub>2</sub>), 3.59 (s, 3H, O-CH<sub>3</sub>), 2.90 – 2.67 (m, 2H, C<sub>Ar</sub>-CH<sub>2</sub>), 1.71 – 1.22 (m, 4H,

NH-CH(CH<sub>2</sub>)<sub>2</sub>), 1.40 (s, 9H, O-C(CH<sub>3</sub>)<sub>3</sub>), 1.18 (s, 3H, C(CH<sub>3</sub>)<sub>2</sub>), 1.17 (s, 3H, C(CH<sub>3</sub>)<sub>2</sub>), 1.16 (s, 3H, C(CH<sub>3</sub>)<sub>2</sub>), 1.15 (s, 3H, C(CH<sub>3</sub>)<sub>2</sub>), 1.01 (s, 9H, Si-C(CH<sub>3</sub>)<sub>3</sub>), 0.99 (s, 9H, Si-C(CH<sub>3</sub>)<sub>3</sub>), 0.21 (s, 6H, Si(CH<sub>3</sub>)<sub>2</sub>), 0.20 (s, 6H, Si(CH<sub>3</sub>)<sub>2</sub>) ppm. <sup>13</sup>C NMR (101 MHz, MeOD, 298 K)  $\delta$  = 178.3 (CH-CONH), 157.4 (CH-NHCOO), 147.8 (O-C<sub>Ar</sub>), 146.9 (O-C<sub>Ar</sub>), 131.7 (C<sub>Ar</sub>-CH<sub>2</sub>), 123.7 (C<sub>Ar</sub>H), 123.6 (C<sub>Ar</sub>H), 122.0 (O-C<sub>Ar</sub>-C<sub>Ar</sub>H-C<sub>Ar</sub>H), 80.6 (O-C(CH<sub>3</sub>)<sub>3</sub>), 65.9 (O-CH<sub>3</sub>), 61.0 (C(CH<sub>3</sub>)<sub>2</sub>), 57.6 (C<sub>Ar</sub>-CH<sub>2</sub>-CH), 46.0 (CH-(CH<sub>2</sub>)<sub>2</sub>), 45.9 (CH-(CH<sub>2</sub>)<sub>2</sub>), 42.1 (NH-CH(CH<sub>2</sub>)<sub>2</sub>), 39.0 (C<sub>Ar</sub>-CH<sub>2</sub>-CH), 33.5 (C(CH<sub>3</sub>)<sub>2</sub>), 33.4 (C(CH<sub>3</sub>)<sub>2</sub>), 28.7 (O-C(CH<sub>3</sub>)<sub>3</sub>), 26.6 (Si-C(CH<sub>3</sub>)<sub>3</sub>), 26.5 (Si-C(CH<sub>3</sub>)<sub>3</sub>), 20.9 (C(CH<sub>3</sub>)<sub>2</sub>), 20.8 (C(CH<sub>3</sub>)<sub>2</sub>), 19.4 (Si-C(CH<sub>3</sub>)<sub>3</sub>), -3.7 (Si-(CH<sub>3</sub>)<sub>2</sub>), -3.7 (Si-(CH<sub>3</sub>)<sub>2</sub>) ppm. HRMS (*m/z*) calculated for C<sub>36</sub>H<sub>68</sub>N<sub>3</sub>O<sub>6</sub>Si<sub>2</sub> [M+H]<sup>+</sup> 694.4641, found 694.4648. M.p. 148 °C.

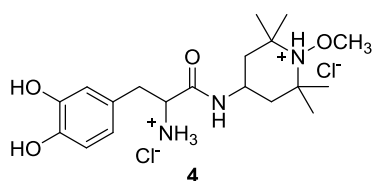

*DOPA-TEMPO-CH<sub>3</sub> dihydrochloride (4)*: All solvents were purged with N<sub>2</sub> for 20 min prior to use. (TBDMS)<sub>2</sub>-*N*-Boc-DOPA-TEMPO-CH<sub>3</sub> (**3**) (1.20 g, 1.7 mmol, 1.0 eq.) was dissolved in diethyl ether (5 mL). 2M HCl in diethyl ether (8.5 mL, 10.0 eq.) was added dropwise and

the solution was stirred at room temperature overnight. The solvent was evaporated and the residue was washed with diethyl ether (25 mL). The crude product was redissolved in water (10 mL, acidified with a few drops of 1M HCl), filtered and lyophilized yielding a white-orange solid (0.61 g, 1.4 mmol, 82%).

<sup>1</sup>H NMR (400 MHz, MeOD, 298 K)  $\delta$  = 6.76 (d, *J* = 8.0 Hz, 1H, O-C<sub>Ar</sub>-C<sub>Ar</sub>H-C<sub>Ar</sub>H), 6.67 (d, *J* = 2.1 Hz, 1H, O-C<sub>Ar</sub>-C<sub>Ar</sub>H-C<sub>Ar</sub>H), 6.60 (dd, *J* = 8.0, 2.1 Hz, 1H, O-C<sub>Ar</sub>-C<sub>Ar</sub>H-C<sub>Ar</sub>H), 4.22 – 4.15 (m, 1H, NH-CH(CH<sub>2</sub>)<sub>2</sub>), 4.21 (s, 3H, O-CH<sub>3</sub>), 3.94 – 3.86 (m, 1H, C<sub>Ar</sub>-CH<sub>2</sub>-CH), 3.04 – 2.87 (m, 2H, C<sub>Ar</sub>-CH<sub>2</sub>-CH), 2.10 – 1.65 (m, 4H, NH-CH(CH<sub>2</sub>)<sub>2</sub>), 1.62 (s, 3H, C(CH<sub>3</sub>)<sub>2</sub>), 1.61 (s, 3H, C(CH<sub>3</sub>)<sub>2</sub>), 1.51 (s, 3H, C(CH<sub>3</sub>)<sub>2</sub>), 1.50 (s, 3H, C(CH<sub>3</sub>)<sub>2</sub>) ppm. <sup>13</sup>C NMR (101 MHz, MeOD, 298 K)  $\delta$  = 169.2 (CONH), 146.7 (O-C<sub>Ar</sub>), 146.1 (O-C<sub>Ar</sub>), 126.8 (C<sub>Ar</sub>-CH<sub>2</sub>), 121.9 (O-C<sub>Ar</sub>-C<sub>Ar</sub>H-C<sub>Ar</sub>H), 117.7 (O-C<sub>Ar</sub>-C<sub>Ar</sub>H-C<sub>Ar</sub>H), 116.8 (O-C<sub>Ar</sub>-C<sub>Ar</sub>H-C<sub>Ar</sub>H), 71.7 (C(CH<sub>3</sub>)<sub>2</sub>), 71.6 (C(CH<sub>3</sub>)<sub>2</sub>), 68.5 (O-CH<sub>3</sub>), 56.0 (C<sub>Ar</sub>-CH<sub>2</sub>-CH), 42.7 (NH-CH(CH<sub>2</sub>)<sub>2</sub>), 42.6 (NH-CH(CH<sub>2</sub>)<sub>2</sub>), 40.5 (NH-CH(CH<sub>2</sub>)<sub>2</sub>), 38.2 (C<sub>Ar</sub>-CH<sub>2</sub>-CH), 28.5 (C(CH<sub>3</sub>)<sub>2</sub>), 28.4 (C(CH<sub>3</sub>)<sub>2</sub>), 21.0 (C(CH<sub>3</sub>)<sub>2</sub>), 21.0 (C(CH<sub>3</sub>)<sub>2</sub>) ppm. HRMS (*m/z*) calculated for C<sub>19</sub>H<sub>32</sub>N<sub>3</sub>O<sub>4</sub> [M-HCl-Cl]<sup>+</sup> 366.2387, found 366.2389. M.p. 138 °C (dec.).

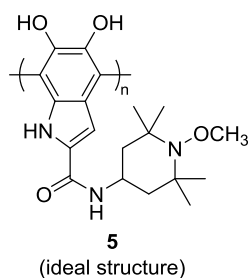

*Poly(DOPA-TEMPO-CH<sub>3</sub>) (5)*: Compound **4** (548 mg, 1.25 mmol) was dissolved in 10 mM Tris buffer (151 mg, 1.25 mmol in 125 mL H<sub>2</sub>O) previously adjusted to pH 8.5 using 1M HCl. The solution of **4** was vigorously stirred in an open glass vial. The pH value was carefully readjusted and maintained within the first 30 min of polymerization at pH 8.25 ± 0.05 using Tris. After 72 h the precipitate was isolated by centrifugation and decantation. The solid was washed with water (3 × 30 mL) followed by centrifugation and decantation. The product was lyophilized yielding a yellow-brown solid (80 mg).

### NMR spectra

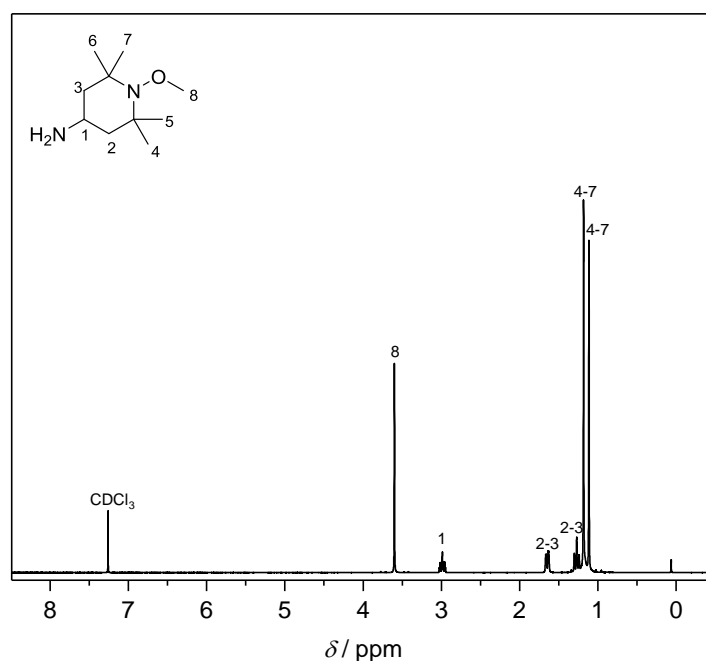

**Fig. S1** <sup>1</sup>H NMR spectrum (400 MHz, CDCl<sub>3</sub>, 298 K) of 1-methoxy-2,2,6,6-tetramethylpiperidin-4-amine (**2**).

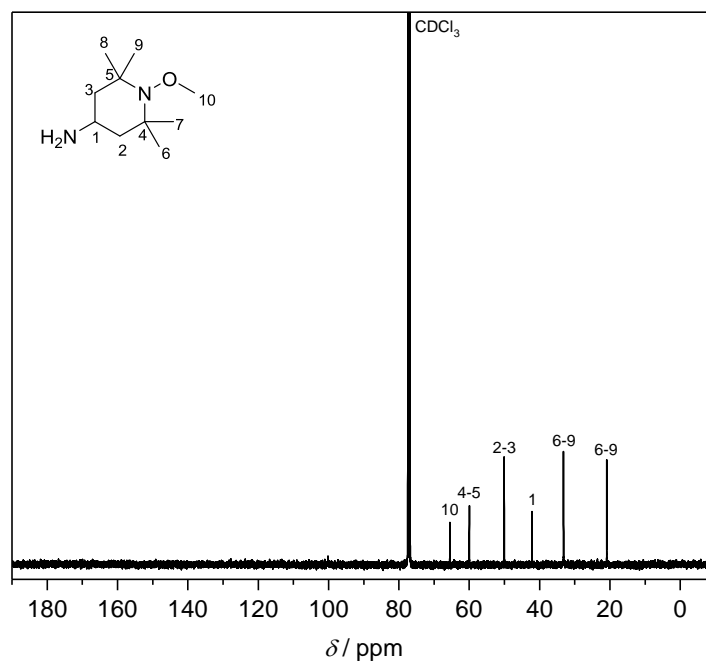

**Fig. S2**  $^{13}\text{C}$  NMR spectrum (101 MHz,  $\text{CDCl}_3$ , 298 K) of 1-methoxy-2,2,6,6-tetramethylpiperidin-4-amine (**2**).

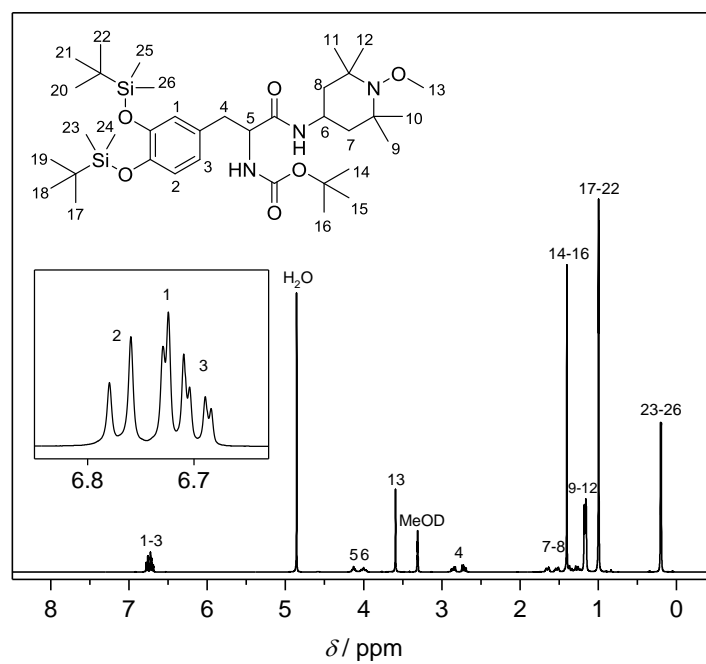

**Fig. S3**  $^1\text{H}$  NMR spectrum (400 MHz, MeOD, 298 K) of (TBDMS) $_2$ -N-Boc-DOPA-TEMPO-CH $_3$  (**3**).

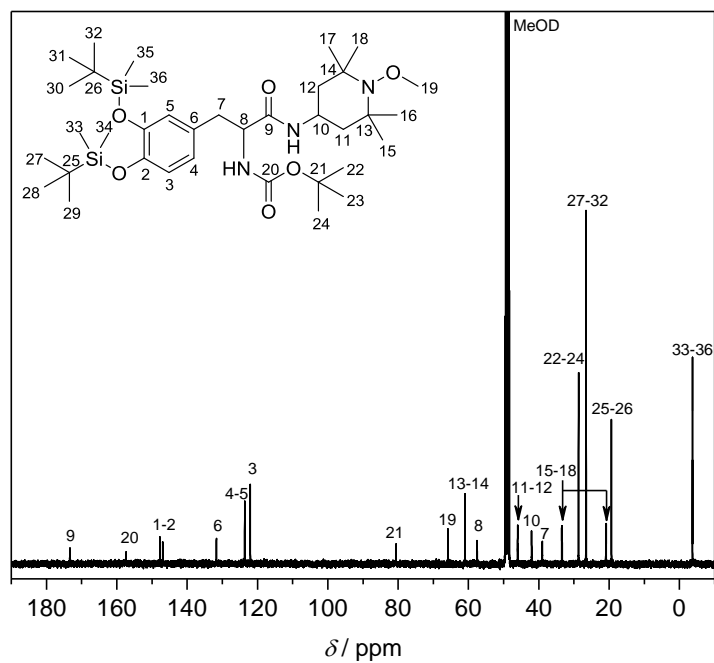

**Fig. S4**  $^{13}\text{C}$  NMR spectrum (101 MHz, MeOD, 298 K) of  $(\text{TBDMS})_2\text{-N-Boc-DOPA-TEMPO-CH}_3$  (**3**).

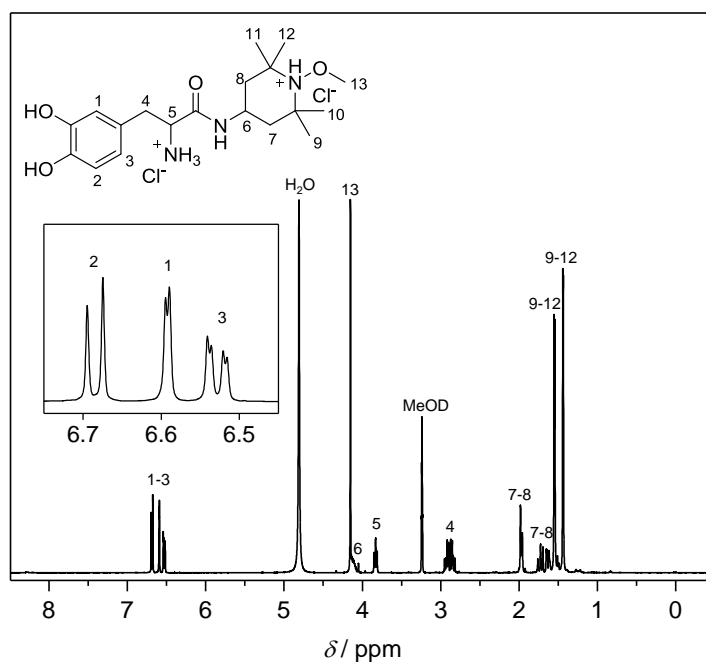

**Fig. S5**  $^1\text{H}$  NMR spectrum (400 MHz, MeOD, 298 K) of DOPA-TEMPO- $\text{CH}_3$  dihydrochloride (**4**).

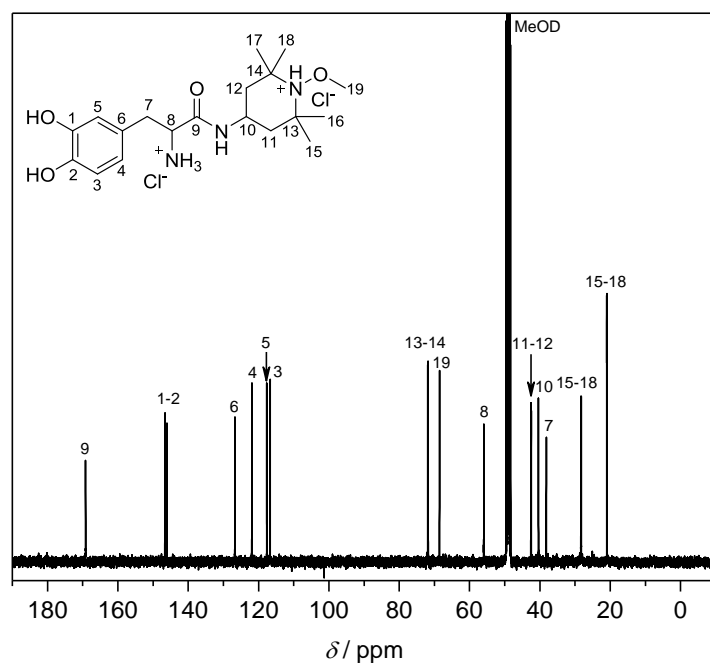

**Fig. S6.**  $^{13}\text{C}$  NMR spectrum (101 MHz, MeOD, 298 K) of DOPA-TEMPO- $\text{CH}_3$  dihydrochloride (4).

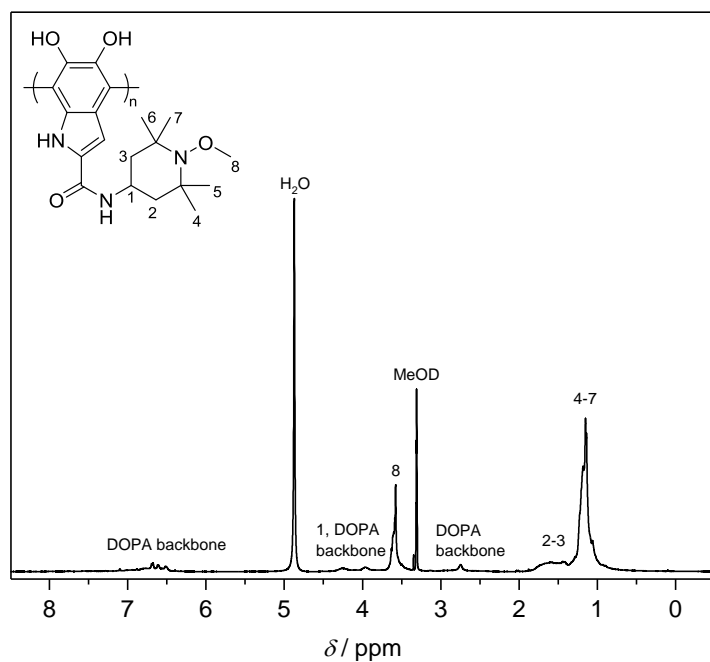

**Fig. S7**  $^1\text{H}$  NMR spectrum (400 MHz, MeOD, 298 K) of poly(DOPA-TEMPO- $\text{CH}_3$ ) (5) depicted as an ideal structure.



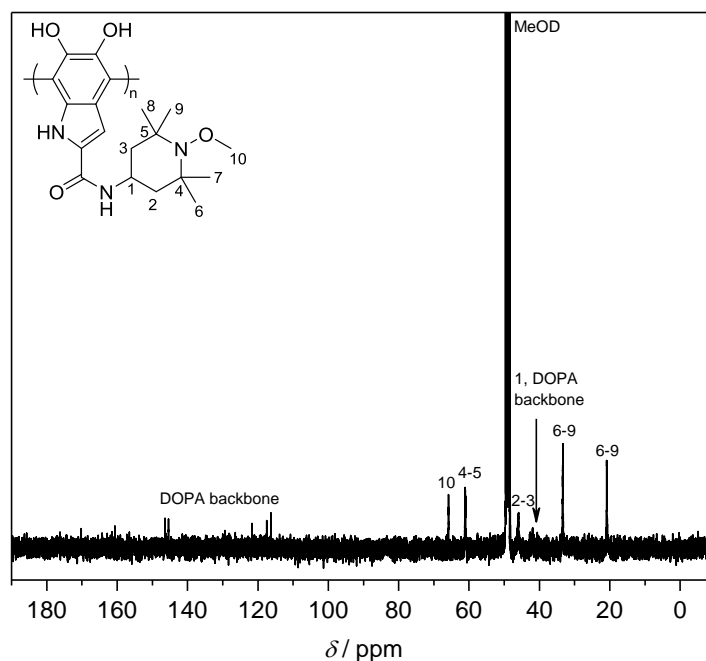

**Fig. S8**  $^{13}\text{C}$  NMR spectrum (101 MHz, MeOD, 298 K) of poly(DOPA-TEMPO-CH<sub>3</sub>) (**5**) depicted as an ideal structure.

### MS spectra and peak assignments

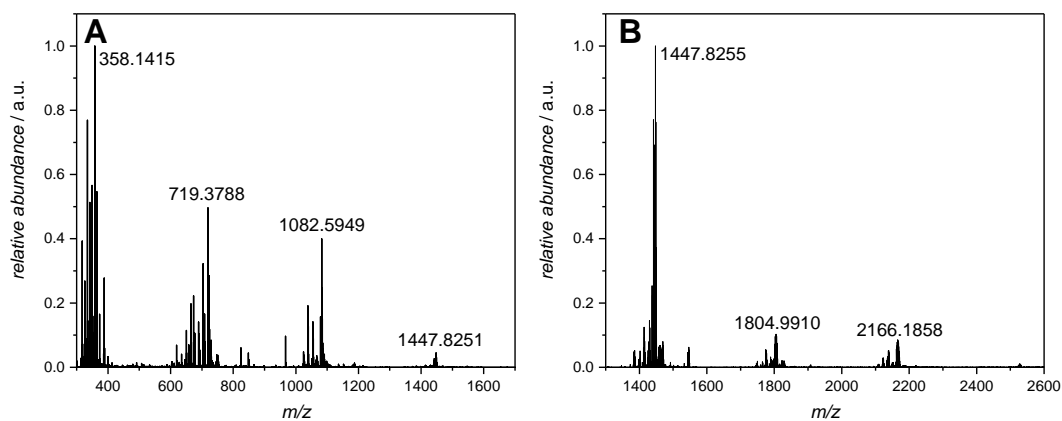

**Fig. S9** ESI(-)-CID MS overview spectra of poly(DOPA-TEMPO-CH<sub>3</sub>) (**5**) in H<sub>2</sub>O/acetonitrile 1:1 (v/v) doped with 0.1% (v/v) acetic acid depicted from (A)  $m/z$  300 – 1700 and (B)  $m/z$  1300 – 2600. The most abundant peaks of each isotopic pattern are labelled with  $m/z(\text{exp})$  (refer to Table S1 for structural assignments).

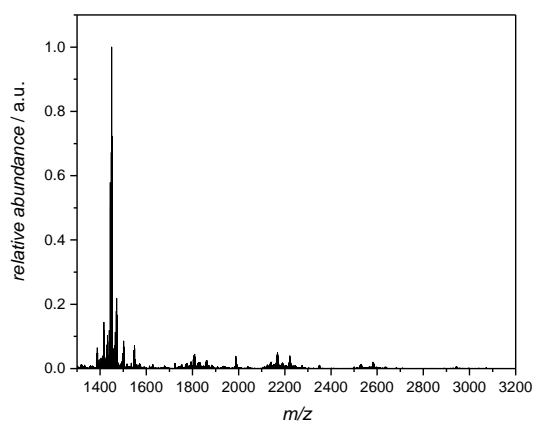

**Fig. S10** ESI(+)-CID MS overview spectra of poly(DOPA-TEMPO-CH<sub>3</sub>) (**5**) in H<sub>2</sub>O/acetonitrile 1:1 (v/v) doped with 0.1% (v/v) acetic acid depicted from  $m/z$  1300 – 3200.

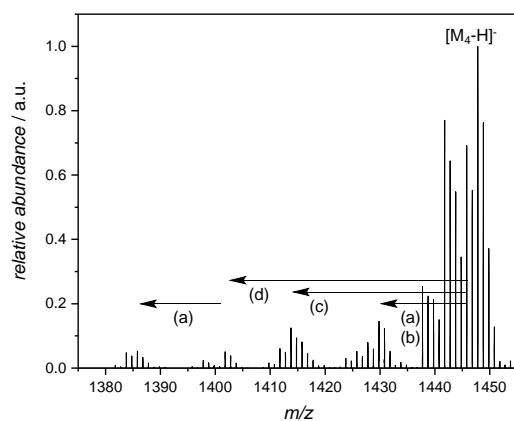

**Fig. S11** Selected ESI(-)-CID MS spectrum of poly(DOPA-TEMPO-CH<sub>3</sub>) (**5**) in H<sub>2</sub>O/acetonitrile 1:1 (v/v) doped with 0.1% (v/v) acetic acid depicted from  $m/z$  1370 – 1455 exemplarily showing typical single-charged oligomer profile of tetrameric species. The characteristic fragmentation pattern (black arrows) suggests liberation of -OH groups (a), -CH<sub>3</sub> groups (b), -OCH<sub>3</sub> groups (c), as well as C<sub>2</sub>H<sub>2</sub>O-fragments (d) as a portion of the phenyl ring.<sup>3</sup> For [M<sub>4</sub>-H]<sup>-</sup> zoomed spectrum with simulated isotopic patterns and peak assignments refer to Fig. 3 and Table S1.

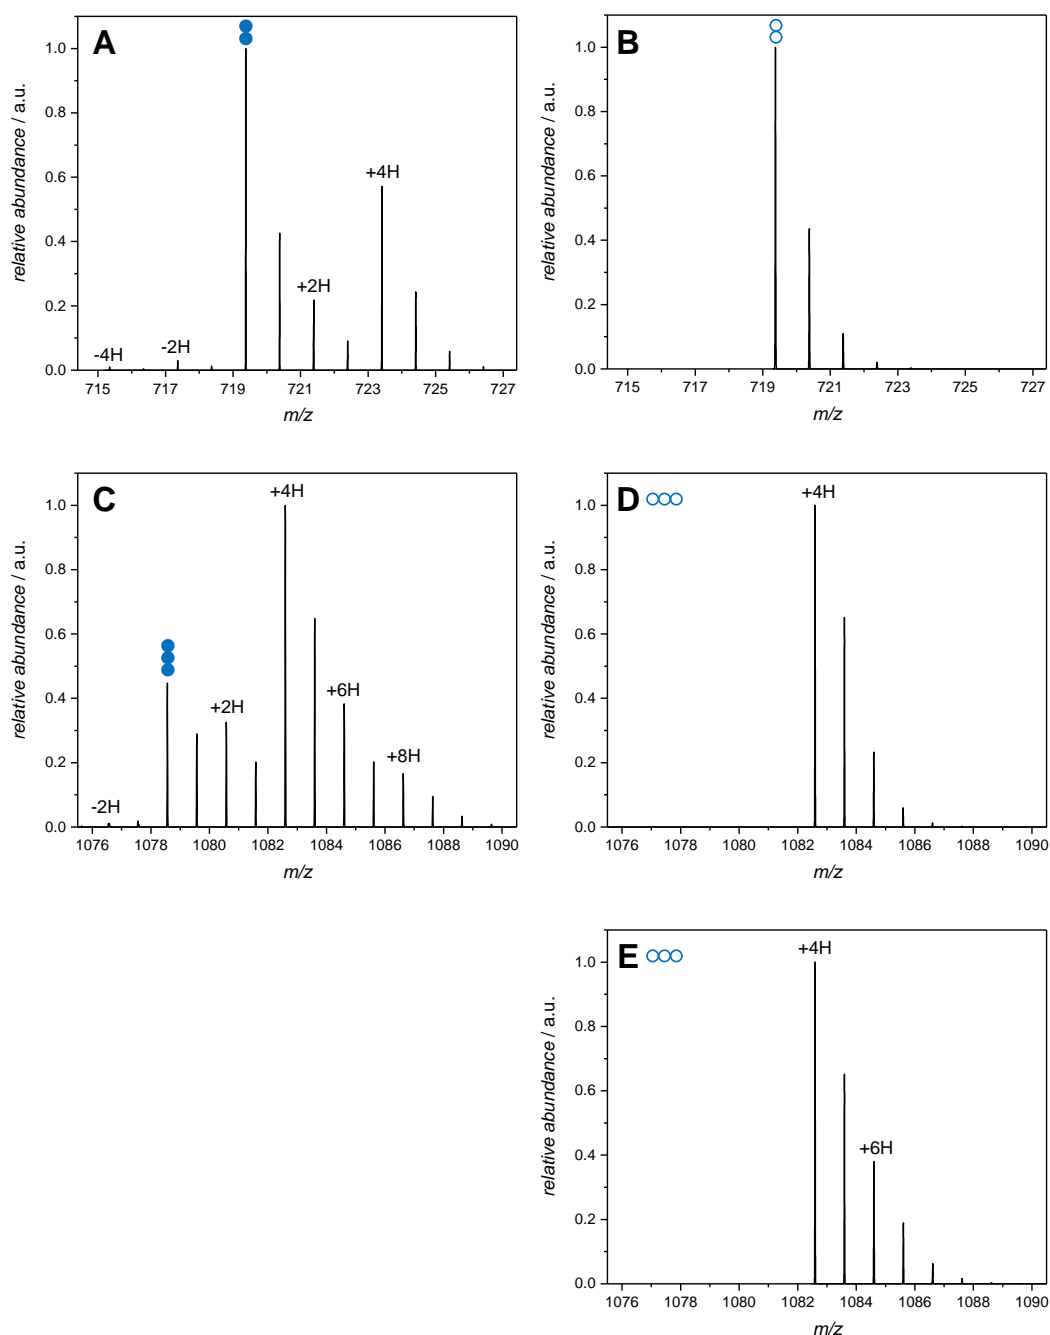

**Fig. S12** Comparison of experimentally obtained spectrum of dimer region  $[M_2-H]^-$  (A) (negative ion mode, refer to Fig. 1) and simulated isotopic pattern of most abundant peak (DHI homodimer) (B) indicating the presence of higher molecular weight species such as +2H and +4H dimers. The same comparison was performed for the trimer region  $[M_3-H]^-$  with the experimentally obtained spectrum (C) (negative ion mode, refer to Fig. 1) and the simulated isotopic patterns of the most abundant species (+4H) (D) and additionally +6H (E) clearly indicating the presence of +8H dimer which correspond to incorporated open-chain dopamine units (refer to Fig S13). Blue filled circles (experimentally obtained spectra) and blue unfilled circles (simulated spectra) represent the molecular ion peak of the homodimer with DHI as the polymer backbone repeating unit. For peak assignments refer to Table S1.

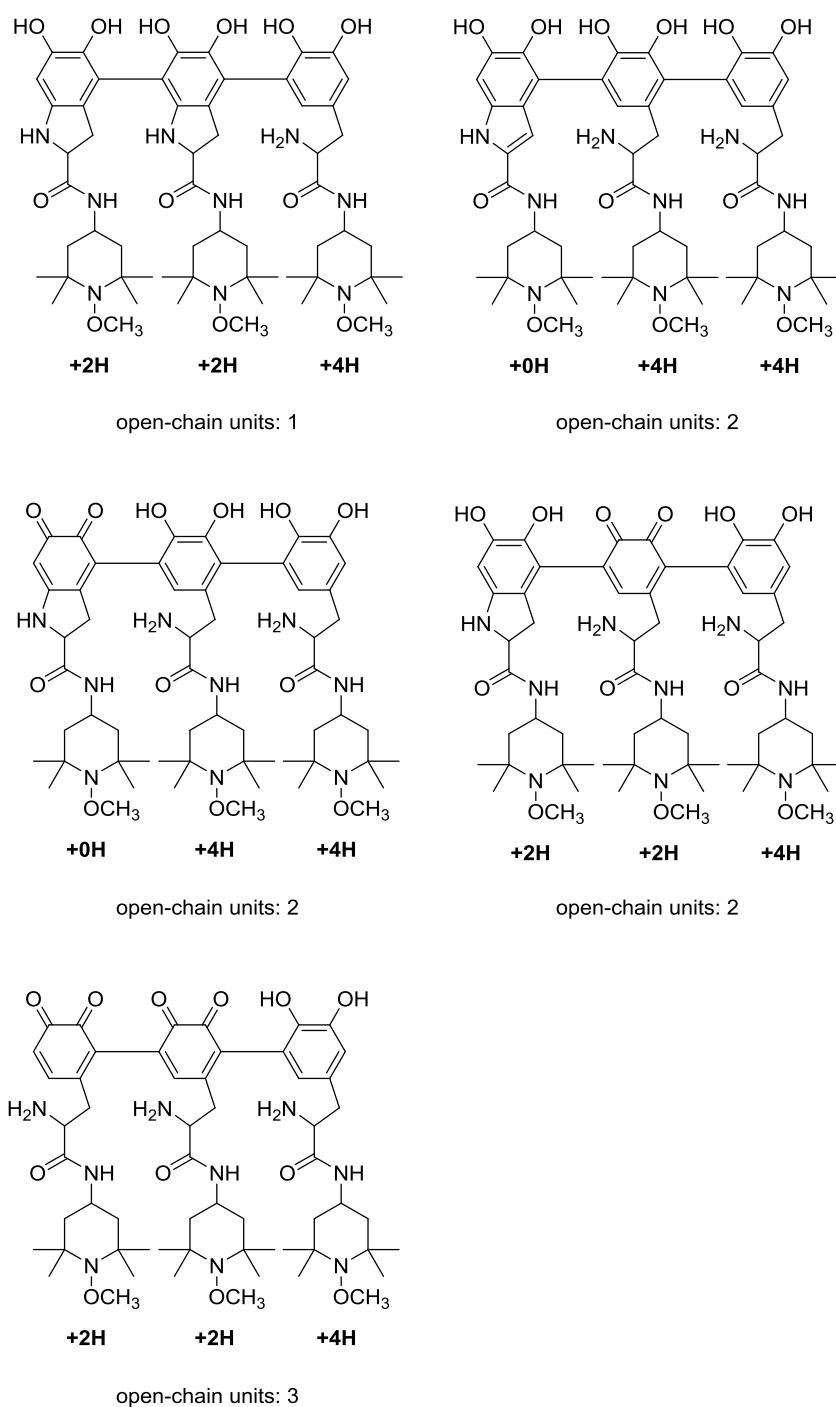

**Fig. S13** Proposed structures of +8H trimeric isomers with  $m/z(\text{theo})$  1086.6192 ( $m/z(\text{exp})$  1086.6257, refer to Fig. 3 and Table S1) with different numbers of incorporated open-chain units.

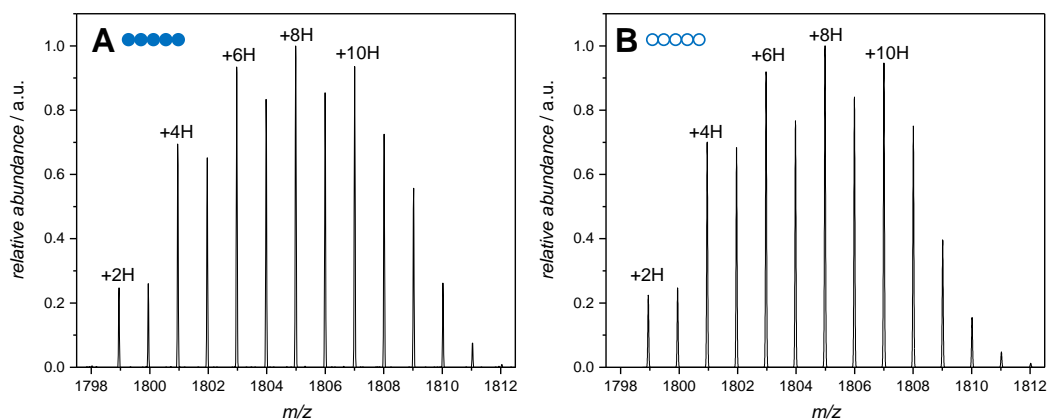

**Fig. S14** Comparison of the ESI(-)-CID MS spectrum of poly(DOPA-TEMPO-CH<sub>3</sub>) (**5**) in H<sub>2</sub>O/acetonitrile 1:1 (v/v) doped with 0.1% (v/v) acetic acid of [M<sub>5</sub>-H]<sup>-</sup> species (**A**) depicted from *m/z* 1798 – 1812 and (**B**) corresponding simulated isotopic patterns. For peak assignments refer to Table S1.

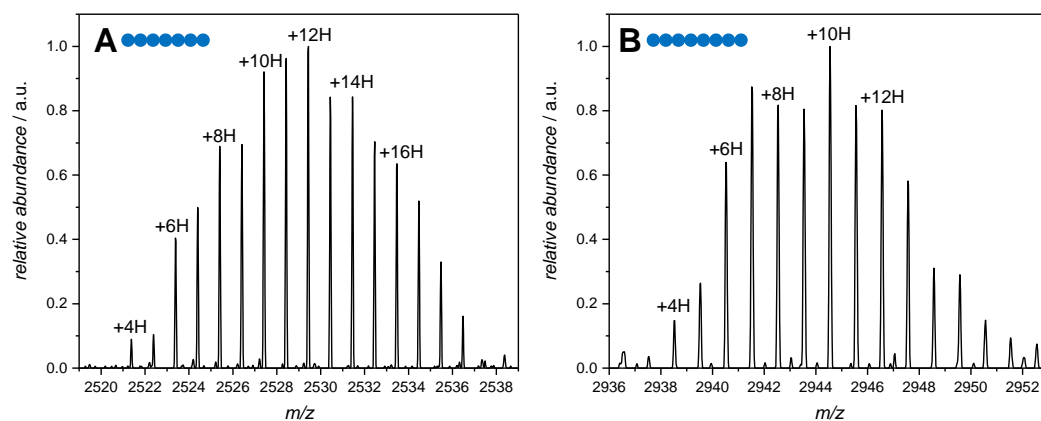

**Fig. S15** ESI(+)-CID MS spectrum of poly(DOPA-TEMPO-CH<sub>3</sub>) (**5**) in H<sub>2</sub>O/acetonitrile 1:1 (v/v) doped with 0.1% (v/v) acetic acid. (**A**) Heptamer profile [M<sub>7</sub>+H]<sup>+</sup> depicted from *m/z* 2519 – 2539 and (**B**) octamer profile [M<sub>8</sub>+H+NaCl]<sup>+</sup> depicted from *m/z* 2936 – 2953. [M<sub>8</sub>+H]<sup>+</sup> species (only detected as a minor single-charged profile) are not displayed. For peak assignments refer to Table S3.

**Table S1** ESI(-)-CID MS peak assignments of  $[M_n-H]^-$  oligomers with  $n = 2 - 6$  of poly(DOPA-TEMPO-CH<sub>3</sub>) (**5**). Isotopic pattern simulations were conducted using the Xcalibur software. The  $m/z$ (theo) values were obtained from simulated spectra.

| $[M_2-H]^-$ , DIMER ●● $\pm 2xH$<br>(refer to Fig. 1 and Fig. S12)   |                                                                  |             |              |              |                    |            |                |
|----------------------------------------------------------------------|------------------------------------------------------------------|-------------|--------------|--------------|--------------------|------------|----------------|
| label                                                                | formula of $M_2$                                                 | $m/z$ (exp) | $m/z$ (theo) | $\Delta m/z$ | $\Delta m/z$ [ppm] | resolution | relative ratio |
| -4H                                                                  | C <sub>38</sub> H <sub>48</sub> N <sub>6</sub> O <sub>8</sub>    | 715.3471    | 715.3450     | 0.0021       | 2.94               | 77000      | 0.01           |
| -2H                                                                  | C <sub>38</sub> H <sub>50</sub> N <sub>6</sub> O <sub>8</sub>    | 717.3631    | 717.3603     | 0.0028       | 3.90               | 76000      | 0.03           |
| ●●                                                                   | C <sub>38</sub> H <sub>52</sub> N <sub>6</sub> O <sub>8</sub>    | 719.3788    | 719.3763     | 0.0025       | 3.48               | 77000      | 1.00           |
| +2H                                                                  | C <sub>38</sub> H <sub>54</sub> N <sub>6</sub> O <sub>8</sub>    | 721.3959    | 721.3885     | 0.0074       | 10.26              | 73300      | 0.21           |
| +4H                                                                  | C <sub>38</sub> H <sub>56</sub> N <sub>6</sub> O <sub>8</sub>    | 723.4102    | 723.4071     | 0.0031       | 4.29               | 77600      | 0.57           |
| $[M_3-H]^-$ , TRIMER ●●● $\pm 2xH$<br>(refer to Fig. 1 and Fig. S12) |                                                                  |             |              |              |                    |            |                |
| label                                                                | formula of $M_3$                                                 | $m/z$ (exp) | $m/z$ (theo) | $\Delta m/z$ | $\Delta m/z$ [ppm] | resolution | relative ratio |
| -2H                                                                  | C <sub>57</sub> H <sub>75</sub> N <sub>9</sub> O <sub>12</sub>   | 1076.5486   | 1076.5451    | 0.0034       | 3.16               | 62100      | 0.02           |
| ●●●                                                                  | C <sub>57</sub> H <sub>77</sub> N <sub>9</sub> O <sub>12</sub>   | 1078.5637   | 1078.5607    | 0.0030       | 2.78               | 63500      | 0.46           |
| +2H                                                                  | C <sub>57</sub> H <sub>79</sub> N <sub>9</sub> O <sub>12</sub>   | 1080.5788   | 1080.5738    | 0.0050       | 4.63               | 60300      | 0.29           |
| +4H                                                                  | C <sub>57</sub> H <sub>81</sub> N <sub>9</sub> O <sub>12</sub>   | 1082.5949   | 1082.5914    | 0.0035       | 3.23               | 62200      | 1.00           |
| +6H                                                                  | C <sub>57</sub> H <sub>83</sub> N <sub>9</sub> O <sub>12</sub>   | 1084.6078   | 1084.6032    | 0.0046       | 4.24               | 57700      | 0.29           |
| +8H                                                                  | C <sub>57</sub> H <sub>85</sub> N <sub>9</sub> O <sub>12</sub>   | 1086.6257   | 1086.6192    | 0.0065       | 5.98               | 60400      | 0.14           |
| $[M_4-H]^-$ , TETRAMER ●●●● $\pm 2xH$<br>(refer to Fig. 3)           |                                                                  |             |              |              |                    |            |                |
| label                                                                | formula of $M_4$                                                 | $m/z$ (exp) | $m/z$ (theo) | $\Delta m/z$ | $\Delta m/z$ [ppm] | resolution | relative ratio |
| ●●●●                                                                 | C <sub>76</sub> H <sub>102</sub> N <sub>12</sub> O <sub>16</sub> | 1437.7479   | 1437.7453    | 0.0026       | 1.81               | 55900      | 0.31           |
| +2H                                                                  | C <sub>76</sub> H <sub>104</sub> N <sub>12</sub> O <sub>16</sub> | 1439.7605   | 1439.7563    | 0.0042       | 2.92               | 54700      | 0.14           |
| +4H                                                                  | C <sub>76</sub> H <sub>106</sub> N <sub>12</sub> O <sub>16</sub> | 1441.7791   | 1441.7758    | 0.0034       | 2.36               | 56100      | 0.89           |
| +6H                                                                  | C <sub>76</sub> H <sub>108</sub> N <sub>12</sub> O <sub>16</sub> | 1443.7913   | 1443.7874    | 0.0039       | 2.70               | 54100      | 0.38           |
| +8H                                                                  | C <sub>76</sub> H <sub>110</sub> N <sub>12</sub> O <sub>16</sub> | 1445.8102   | 1445.8055    | 0.0047       | 3.25               | 56000      | 0.72           |
| +10H                                                                 | C <sub>76</sub> H <sub>112</sub> N <sub>12</sub> O <sub>16</sub> | 1447.8255   | 1447.8211    | 0.0044       | 3.04               | 55100      | 1.00           |
| $[M_5-H]^-$ , PENTAMER ●●●●● $\pm 2xH$<br>(refer to Fig. S14)        |                                                                  |             |              |              |                    |            |                |
| label                                                                | formula of $M_5$                                                 | $m/z$ (exp) | $m/z$ (theo) | $\Delta m/z$ | $\Delta m/z$ [ppm] | resolution | relative ratio |
| +2H                                                                  | C <sub>95</sub> H <sub>129</sub> N <sub>15</sub> O <sub>20</sub> | 1798.9469   | 1798.9455    | 0.0014       | 0.78               | 54600      | 0.35           |
| +4H                                                                  | C <sub>95</sub> H <sub>131</sub> N <sub>15</sub> O <sub>20</sub> | 1800.9596   | 1800.9592    | 0.0004       | 0.22               | 50300      | 0.90           |
| +6H                                                                  | C <sub>95</sub> H <sub>133</sub> N <sub>15</sub> O <sub>20</sub> | 1802.9748   | 1802.9727    | 0.0021       | 1.16               | 47300      | 0.90           |
| +8H                                                                  | C <sub>95</sub> H <sub>135</sub> N <sub>15</sub> O <sub>20</sub> | 1804.9910   | 1804.9881    | 0.0029       | 1.61               | 47300      | 1.00           |
| +10H                                                                 | C <sub>95</sub> H <sub>137</sub> N <sub>15</sub> O <sub>20</sub> | 1807.0075   | 1807.0031    | 0.0044       | 2.43               | 48800      | 0.85           |

Table S1 continued.

| [M <sub>6</sub> -H] <sup>-</sup> , HEXAMER  ±2xH<br>(refer to Fig. 4) |                                                                   |                  |                   |              |                       |            |                   |
|--------------------------------------------------------------------------------------------------------------------------------------------------------|-------------------------------------------------------------------|------------------|-------------------|--------------|-----------------------|------------|-------------------|
| label                                                                                                                                                  | formula of M <sub>6</sub>                                         | <i>m/z</i> (exp) | <i>m/z</i> (theo) | $\Delta m/z$ | $\Delta m/z$<br>[ppm] | resolution | relative<br>ratio |
| +2H                                                                                                                                                    | C <sub>114</sub> H <sub>154</sub> N <sub>18</sub> O <sub>24</sub> | 2158.1271        | 2158.1300         | 0.0028       | 1.30                  | 44600      | 0.08              |
| +4H                                                                                                                                                    | C <sub>114</sub> H <sub>156</sub> N <sub>18</sub> O <sub>24</sub> | 2160.1414        | 2160.1434         | 0.0020       | 0.93                  | 46400      | 0.25              |
| +6H                                                                                                                                                    | C <sub>114</sub> H <sub>158</sub> N <sub>18</sub> O <sub>24</sub> | 2162.1562        | 2162.1591         | 0.0029       | 1.34                  | 46500      | 0.88              |
| +8H                                                                                                                                                    | C <sub>114</sub> H <sub>160</sub> N <sub>18</sub> O <sub>24</sub> | 2164.1701        | 2164.1716         | 0.0015       | 0.69                  | 45100      | 0.76              |
| +10H                                                                                                                                                   | C <sub>114</sub> H <sub>162</sub> N <sub>18</sub> O <sub>24</sub> | 2166.1858        | 2166.1873         | 0.0015       | 0.69                  | 43000      | 1.00              |
| +12H                                                                                                                                                   | C <sub>114</sub> H <sub>164</sub> N <sub>18</sub> O <sub>24</sub> | 2168.1994        | 2168.2012         | 0.0018       | 0.83                  | 45000      | 0.60              |
| +14H                                                                                                                                                   | C <sub>114</sub> H <sub>166</sub> N <sub>18</sub> O <sub>24</sub> | 2170.2128        | 2170.2156         | 0.0029       | 1.34                  | 47200      | 0.35              |

**Table S2** ESI(-)-CID MS/MS peak assignments of fragments [F<sub>x</sub>-H]<sup>-</sup> with x = 3 – 5 of poly(DOPA-TEMPO-CH<sub>3</sub>) (**5**) performed on hexameric species [M<sub>6</sub>-H]<sup>-</sup> with *m/z* 2166±5 (refer to Fig. 3). Only most abundant peaks of oligomeric fragments were selected. The *m/z*(theo) values of most abundant peaks were calculated without simulation of the overlapping isotopic patterns of the remaining species.

| [F <sub>5</sub> -H] <sup>-</sup> , PENTAMER FRAGMENTS  +6H<br>(refer to Fig. 4E)  |                                                                  |                  |                   |              |                       |            |                   |
|----------------------------------------------------------------------------------------------------------------------------------------------------------------------|------------------------------------------------------------------|------------------|-------------------|--------------|-----------------------|------------|-------------------|
| label                                                                                                                                                                | formula of F <sub>5</sub>                                        | <i>m/z</i> (exp) | <i>m/z</i> (theo) | $\Delta m/z$ | $\Delta m/z$<br>[ppm] | resolution | relative<br>ratio |
| +6H                                                                                                                                                                  | C <sub>95</sub> H <sub>131</sub> N <sub>15</sub> O <sub>20</sub> | 1800.9606        | 1800.9611         | 0.0005       | 0.28                  | 49000      | 1.00              |
| [F <sub>4</sub> -H] <sup>-</sup> , TETRAMER FRAGMENTS  +6H<br>(refer to Fig. 4D) |                                                                  |                  |                   |              |                       |            |                   |
| label                                                                                                                                                                | formula of F <sub>4</sub>                                        | <i>m/z</i> (exp) | <i>m/z</i> (theo) | $\Delta m/z$ | $\Delta m/z$<br>[ppm] | resolution | relative<br>ratio |
| +6H                                                                                                                                                                  | C <sub>76</sub> H <sub>106</sub> N <sub>12</sub> O <sub>16</sub> | 1441.7780        | 1441.7766         | 0.0014       | 0.97                  | 56100      | 1.00              |
| [F <sub>3</sub> -H] <sup>-</sup> , TRIMER FRAGMENTS  +6H<br>(refer to Fig. 4C)    |                                                                  |                  |                   |              |                       |            |                   |
| label                                                                                                                                                                | formula of F <sub>3</sub>                                        | <i>m/z</i> (exp) | <i>m/z</i> (theo) | $\Delta m/z$ | $\Delta m/z$<br>[ppm] | resolution | relative<br>ratio |
| +6H                                                                                                                                                                  | C <sub>57</sub> H <sub>81</sub> N <sub>9</sub> O <sub>12</sub>   | 1082.5941        | 1082.5921         | 0.0020       | 1.85                  | 65100      | 1.00              |

**Table S3** ESI(+)-CID MS peak assignments of  $[M_7+H]^+$  species and  $[M_8+H+NaCl]^+$  species of poly(DOPA-TEMPO-CH<sub>3</sub>) (**5**). Isotopic pattern simulations were conducted using the Xcalibur software. The  $m/z$ (theo) values were obtained from simulated spectra.

| $[M_7+H]^+$ , HEPTAMER  $\pm 2xH$<br>(refer to Fig. S15)     |                              |             |              |              |                    |            |                |
|-----------------------------------------------------------------------------------------------------------------------------------------------|------------------------------|-------------|--------------|--------------|--------------------|------------|----------------|
| label                                                                                                                                         | formula of $M_7$             | $m/z$ (exp) | $m/z$ (theo) | $\Delta m/z$ | $\Delta m/z$ [ppm] | resolution | relative ratio |
| +4H                                                                                                                                           | $C_{133}H_{181}N_{21}O_{28}$ | 2521.3790   | 2521.3458    | 0.0332       | 13.17              | 42500      | 0.20           |
| +6H                                                                                                                                           | $C_{133}H_{183}N_{21}O_{28}$ | 2523.3941   | 2523.3586    | 0.0355       | 14.07              | 36300      | 0.60           |
| +8H                                                                                                                                           | $C_{133}H_{185}N_{21}O_{28}$ | 2525.4050   | 2525.3715    | 0.0334       | 13.23              | 38500      | 0.70           |
| +10H                                                                                                                                          | $C_{133}H_{187}N_{21}O_{28}$ | 2527.4202   | 2527.3869    | 0.0333       | 13.18              | 37800      | 1.00           |
| +12H                                                                                                                                          | $C_{133}H_{189}N_{21}O_{28}$ | 2529.4338   | 2529.4007    | 0.0330       | 13.05              | 38100      | 0.70           |
| +14H                                                                                                                                          | $C_{133}H_{191}N_{21}O_{28}$ | 2531.4493   | 2531.4152    | 0.0341       | 13.47              | 39200      | 0.50           |
| +16H                                                                                                                                          | $C_{133}H_{193}N_{21}O_{28}$ | 2533.4655   | 2533.4309    | 0.0345       | 13.62              | 38600      | 0.40           |
| $[M_8+H+NaCl]^+$ , OCTAMER  $\pm 2xH$<br>(refer to Fig. S15) |                              |             |              |              |                    |            |                |
| label                                                                                                                                         | formula of $M_8$             | $m/z$ (exp) | $m/z$ (theo) | $\Delta m/z$ | $\Delta m/z$ [ppm] | resolution | relative ratio |
| +4H                                                                                                                                           | $C_{152}H_{206}N_{24}O_{32}$ | 2938.5251   | 2938.4889    | 0.0362       | 12.32              | 38500      | 0.40           |
| +6H                                                                                                                                           | $C_{152}H_{208}N_{24}O_{32}$ | 2940.5264   | 2940.4997    | 0.0266       | 9.05               | 35300      | 1.00           |
| +8H                                                                                                                                           | $C_{152}H_{210}N_{24}O_{32}$ | 2942.5366   | 2942.5096    | 0.0270       | 9.18               | 34800      | 0.60           |
| +10H                                                                                                                                          | $C_{152}H_{212}N_{24}O_{32}$ | 2944.5502   | 2944.5227    | 0.0275       | 9.34               | 34500      | 0.80           |
| +12H                                                                                                                                          | $C_{152}H_{214}N_{24}O_{32}$ | 2946.5641   | 2946.5371    | 0.0270       | 9.16               | 34600      | 0.40           |

## References

- <sup>1</sup> Chalmers, B. A.; Morris, J. C.; Fairfull-Smith, K. E.; Grainger, R. S.; Bottle, S. E. *Chem. Commun.* **2013**, 49, 10382-10384.
- <sup>2</sup> Lee, B. P.; Huang, K.; Nunalee, F. N.; Shull, K. R.; Messersmith, P. B. *J. Biomater. Sci., Polym. Ed.* **2004**, 15 (4), 449-464.
- <sup>3</sup> Lee, H.; Dellatore, S. M.; Miller, W. M.; Messersmith, P. B. *science* **2007**, 318, 426.
